# Supplementary material for: The Prognostic Value of Pentraxin-3 in COVID-19 Patients: A Systematic Review and Meta-Analysis of Mortality Incidence
Source: MDPI journal article supplement (doi:10.3390/ijms24043537), 2023-02-10
Supplement: s1 [file s1]

| <b>RISK OF BIAS Table</b>             | <b>SELECTION</b>                            |                                      |                                  |                                                                       | <b>COMPARABILITY</b>            |                          | <b>OUTCOME</b>                |                                  |                              |                |
|---------------------------------------|---------------------------------------------|--------------------------------------|----------------------------------|-----------------------------------------------------------------------|---------------------------------|--------------------------|-------------------------------|----------------------------------|------------------------------|----------------|
|                                       | <b>Representative of the exposed cohort</b> | <b>Selection of external control</b> | <b>Ascertainment of exposure</b> | <b>Outcome of interest does not present at the start of the study</b> | <b>Comparability of Cohorts</b> |                          | <b>Assessment of outcomes</b> | <b>Sufficient follow-up time</b> | <b>Adequacy of follow-up</b> |                |
|                                       |                                             |                                      |                                  |                                                                       | <b>Main Factor</b>              | <b>Additional Factor</b> |                               |                                  |                              |                |
|                                       | <b>1</b>                                    | <b>2</b>                             | <b>3</b>                         | <b>4</b>                                                              | <b>5</b>                        | <b>6</b>                 | <b>7</b>                      | <b>8</b>                         | <b>9</b>                     | <b>OVERALL</b> |
| <b>Assandri et al., 2022</b>          | x                                           | x                                    | x                                |                                                                       | x                               | x                        | x                             | x                                | x                            | 8              |
| <b>Brunetta et al., 2021</b>          | x                                           | x                                    | x                                |                                                                       | x                               | x                        | x                             | x                                | x                            | 8              |
| <b>de Bruin et al., 2021</b>          | x                                           | x                                    | x                                |                                                                       | x                               | x                        | x                             | x                                | x                            | 8              |
| <b>Feitosa et al. 2022</b>            | x                                           | x                                    | x                                |                                                                       | x                               | x                        | x                             | x                                | x                            | 8              |
| <b>Genç et al., 2020</b>              | x                                           | x                                    | x                                |                                                                       | x                               | x                        | x                             | x                                | x                            | 8              |
| <b>Gutmann et al., 2021</b>           | x                                           | x                                    | x                                |                                                                       | x                               | x                        | x                             | x                                | x                            | 8              |
| <b>Hansen et al., 2022</b>            | x                                           | x                                    | x                                |                                                                       | x                               | x                        | x                             | x                                | x                            | 8              |
| <b>Kukla et al., 2021</b>             | x                                           | x                                    | x                                |                                                                       | x                               | x                        | x                             | x                                | x                            | 8              |
| <b>Kusnierz-Cabala et al., 2021</b>   | x                                           | x                                    | x                                |                                                                       | x                               | x                        | x                             | x                                | x                            | 8              |
| <b>Lapadula et al., 2022</b>          | x                                           | x                                    | x                                |                                                                       | x                               | x                        | x                             | x                                | x                            | 8              |
| <b>Moulana et al., 2021</b>           | x                                           | x                                    | x                                |                                                                       | x                               | x                        | x                             | x                                | x                            | 8              |
| <b>Sulicka-Grodzicka et al., 2022</b> | x                                           | x                                    | x                                |                                                                       | x                               | x                        | x                             | x                                | x                            | 8              |

**Additional file 1.** Table with Risk of Bias judgement according NOS score
